# Supplementary material for: The dlx5a/dlx6a Genes Play Essential Roles in the Early Development of Zebrafish Median Fin and Pectoral Structures
Source: PubMed Central journal article supplement (PMC4032342; doi:10.1371/journal.pone.0098505), 2014-05-23
Supplement: pone.0098505.s001.pdf [file pone.0098505.s001.pdf]

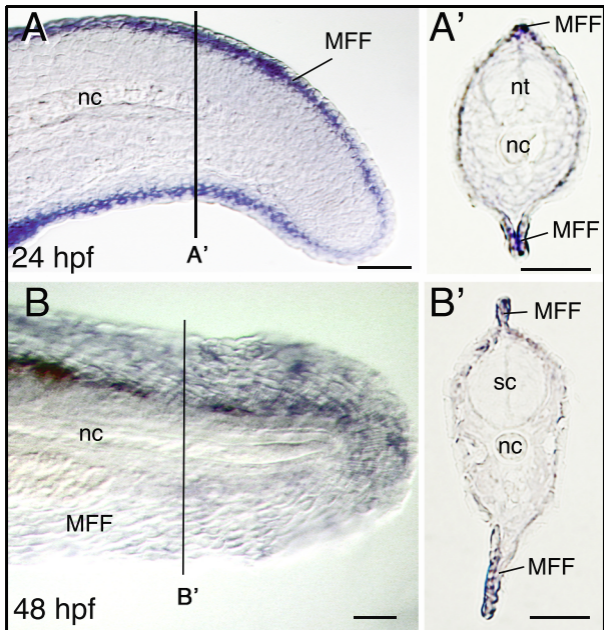

Fig. S1
